# Supplementary material
Source: PubMed Central journal article supplement (PMC4965335)
Supplement: NIHMS791831-supplement-Supplemental_Materials.pdf [file NIHMS791831-supplement-Supplemental_Materials.pdf]

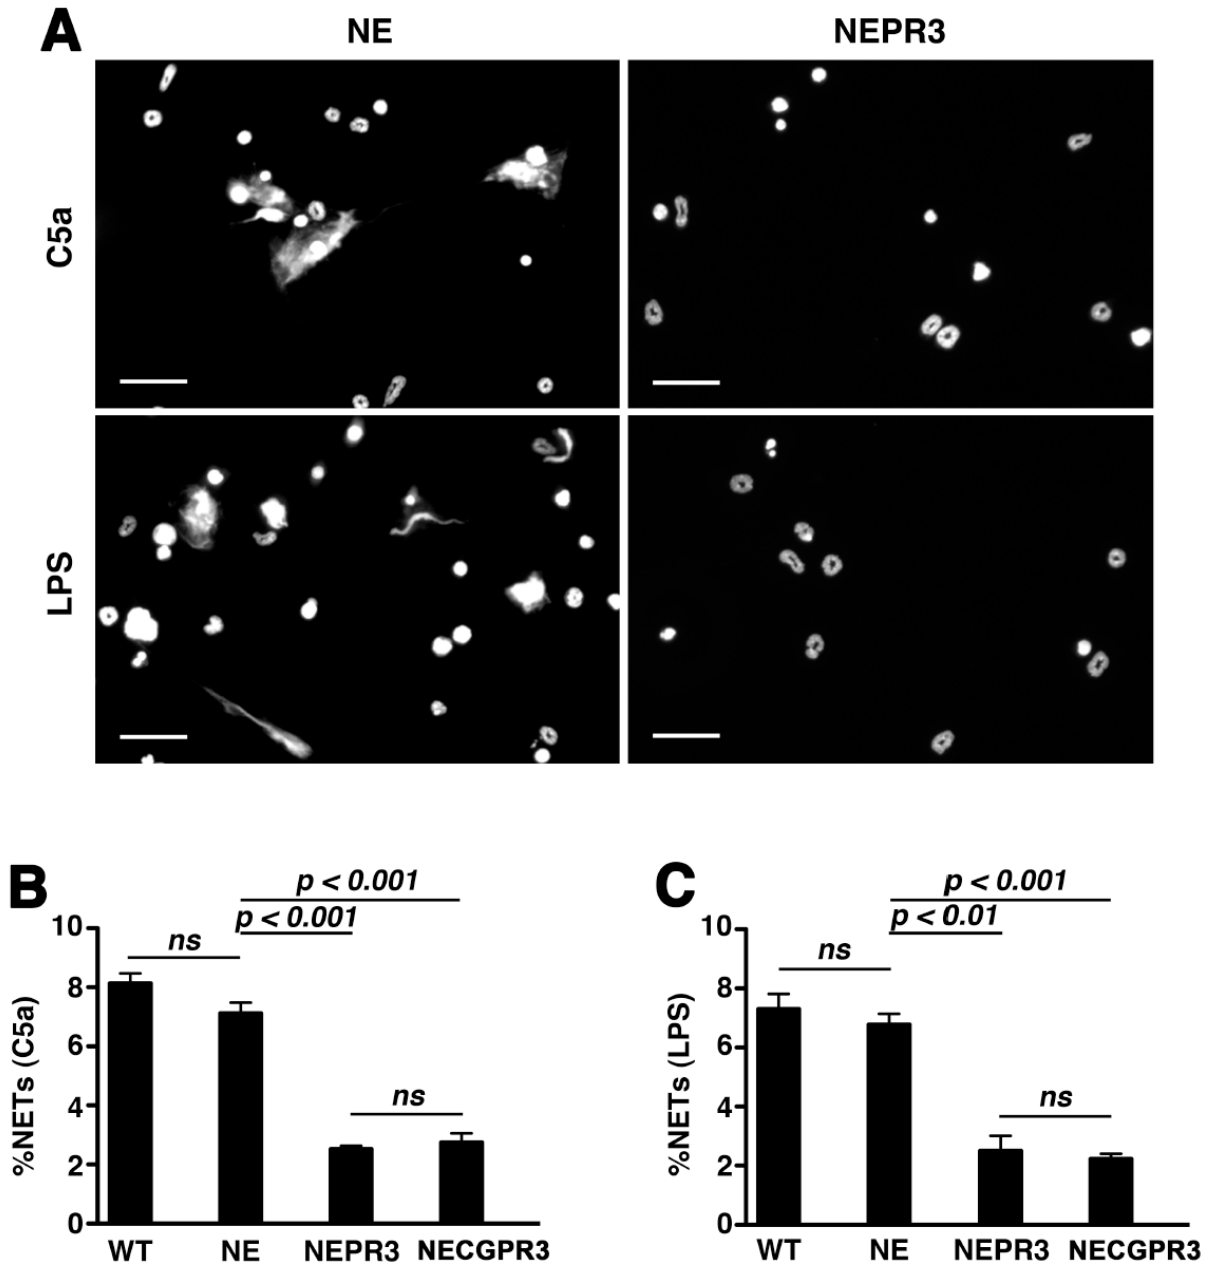

**Figure S-I. C5a and LPS induce NETs *in vitro*.** (A) Bone marrow-derived neutrophils were stimulated with C5a (100 mg/L, Cat # 2150-C5-025/CF, R&D Systems Inc.) or LPS (10 mg/L, Cat # L2762, Sigma-Aldrich) for 30 min and stained for DNA with Sytox green. Quantification of NETs released from neutrophils stimulated with C5a (B) and LPS (C). Data presented are mean  $\pm$  SEM derived from 3 separate experiments. Scale bar = 25  $\mu$ m.

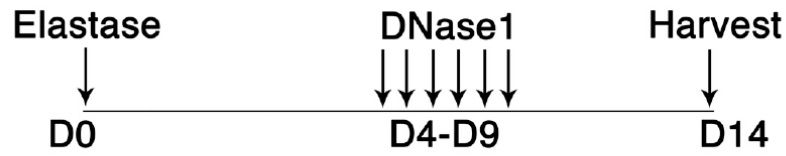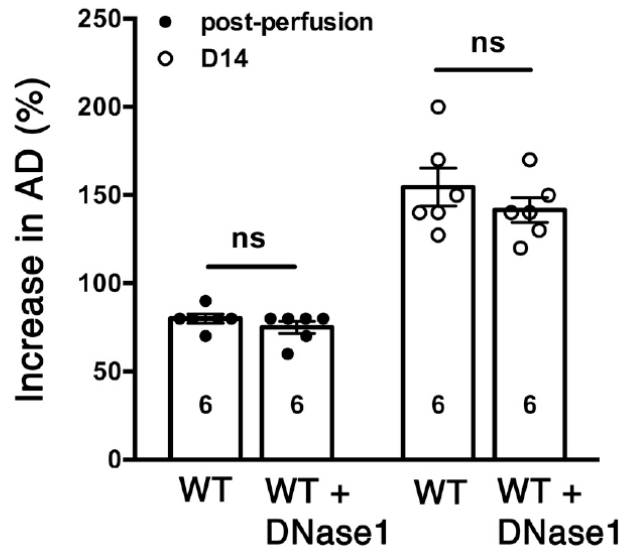

**Figure S-II. Delayed DNase1 treatment does not suppress elastase-induced AAA.** WT mice were perfused with elastase on day 0 and administered DNase1 (20 U i.v. and 100 U i.p.) twice a day from days 4-9. There was no statistical difference in AD immediately post perfusion or on day 14. N = 3 mice per treatment group. ns = not significant.

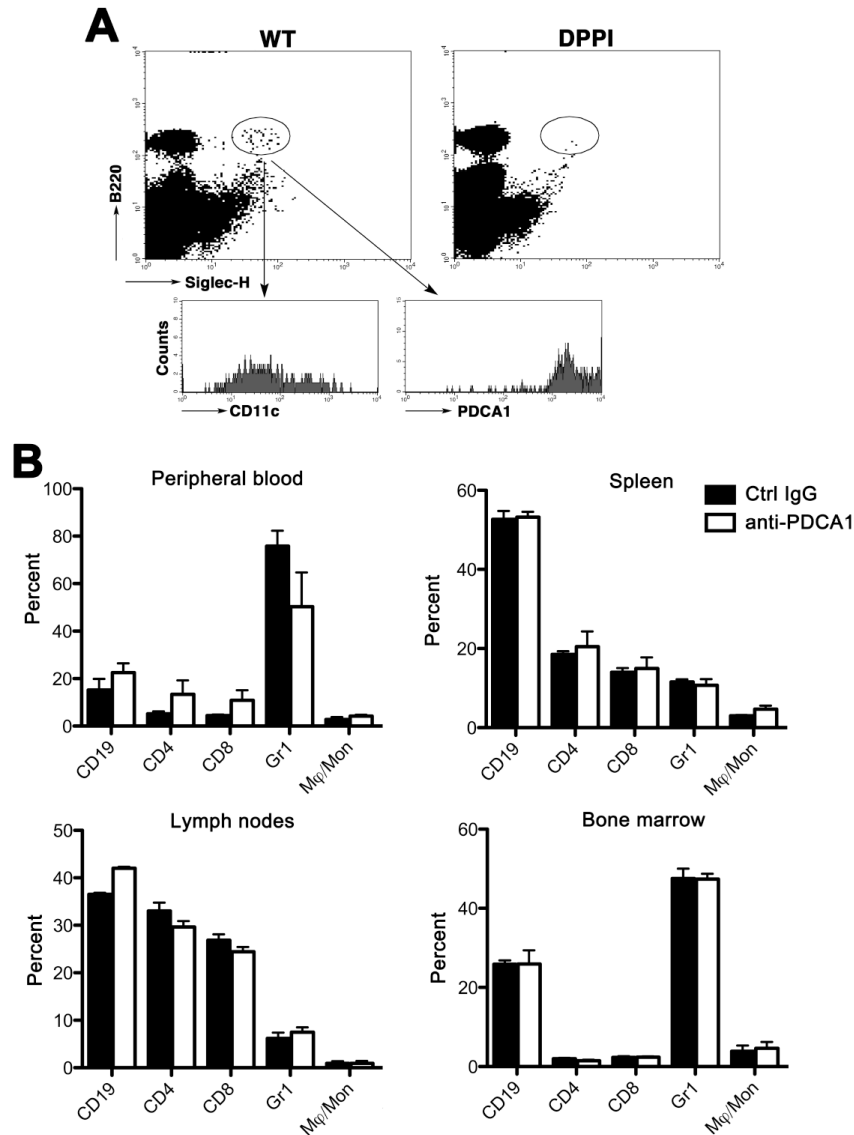

**Figure S-III. Evaluation of pDCs in aortas and effects of pDC depletion in immune organs.**

**(A)** B220<sup>+</sup>Siglec-H<sup>+</sup> cells express low to moderate level of CD11c and high level of PDCA1, confirming that they are indeed pDCs. **(B)** Single cell suspensions from mice injected with isotype control or anti-PDCA1 mAb on days -1 and -2 (N = 3 mice per treatment group) were also prepared from various organs (spleen, lymph nodes, bone marrow, peripheral blood) on day 1 post elastase perfusion. Cells were stained with various surface markers including: CD19-FITC (Cat #09654, BD Pharmingen), CD4-PE (Cat # 3100408, BioLegend), CD8 $\alpha$ -PerCP (Cat # 100731, BioLegend), Gr1-FITC (Cat # 553127, BD Pharmingen), F4/80-PerCP (Cat # 123126, BioLegend), CD11b-APC (Cat # 17-0112-82, eBioscience), CD11b-AlexaFluor 488 (Cat # 101217, BioLegend), mSIGLEC-H (Cat # MCA4647GA, AbD Serotec), CD11c-PE (Cat # 553802, BD Pharmingen), CD317 (PDCA1)-PerCP (Cat # 46-3172-80, eBioscience), CD45R/B220-APC (Cat # 553092, BD Pharmingen) and analyzed by flow cytometry. M $\phi$ /MON: macrophages/monocytes that are F4/80<sup>+</sup>, CD11b (high), and CD11c-

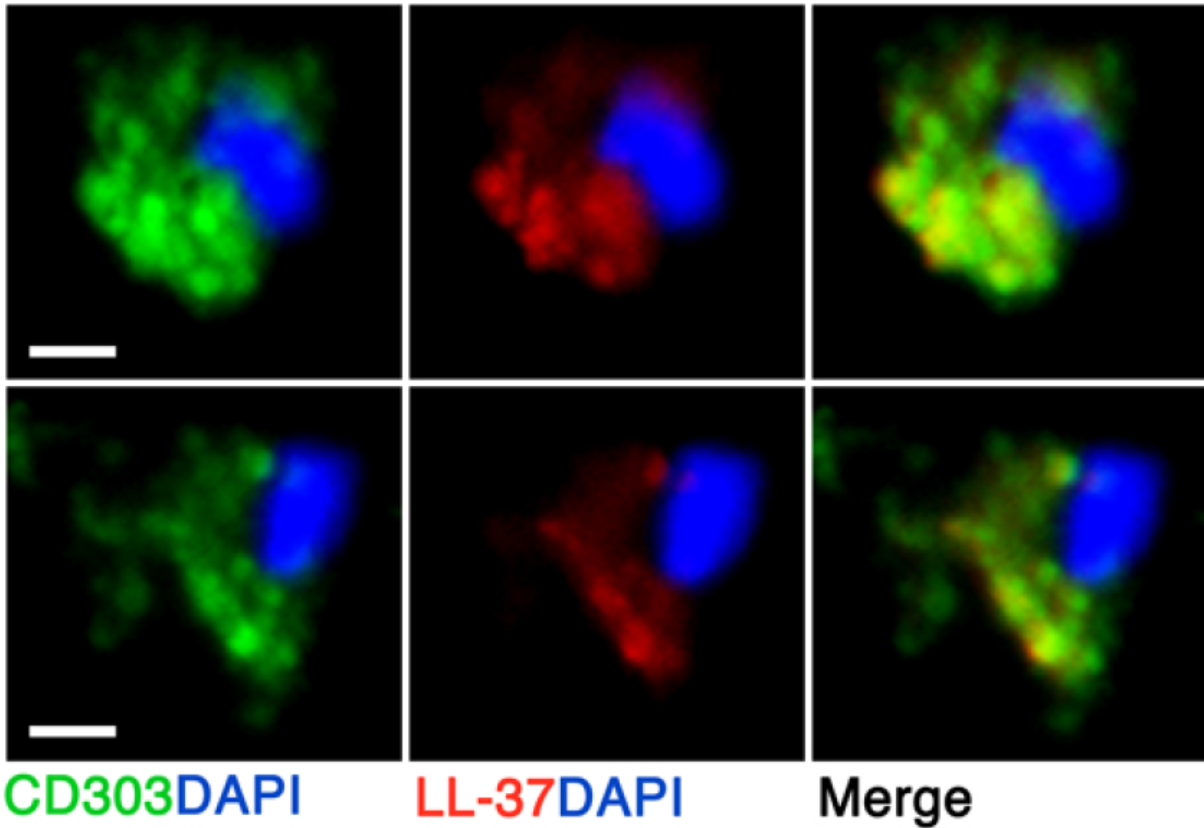

**Figure S-IV. Human pDCs in AAA tissues take up LL-37.** Human AAA tissues were examined for CD303 (green) and LL-37 (red). DAPI stains nuclei (blue). Scale bars = 10  $\mu$ m
