# Supplementary material
Source: PubMed Central journal article supplement (PMC4965335)

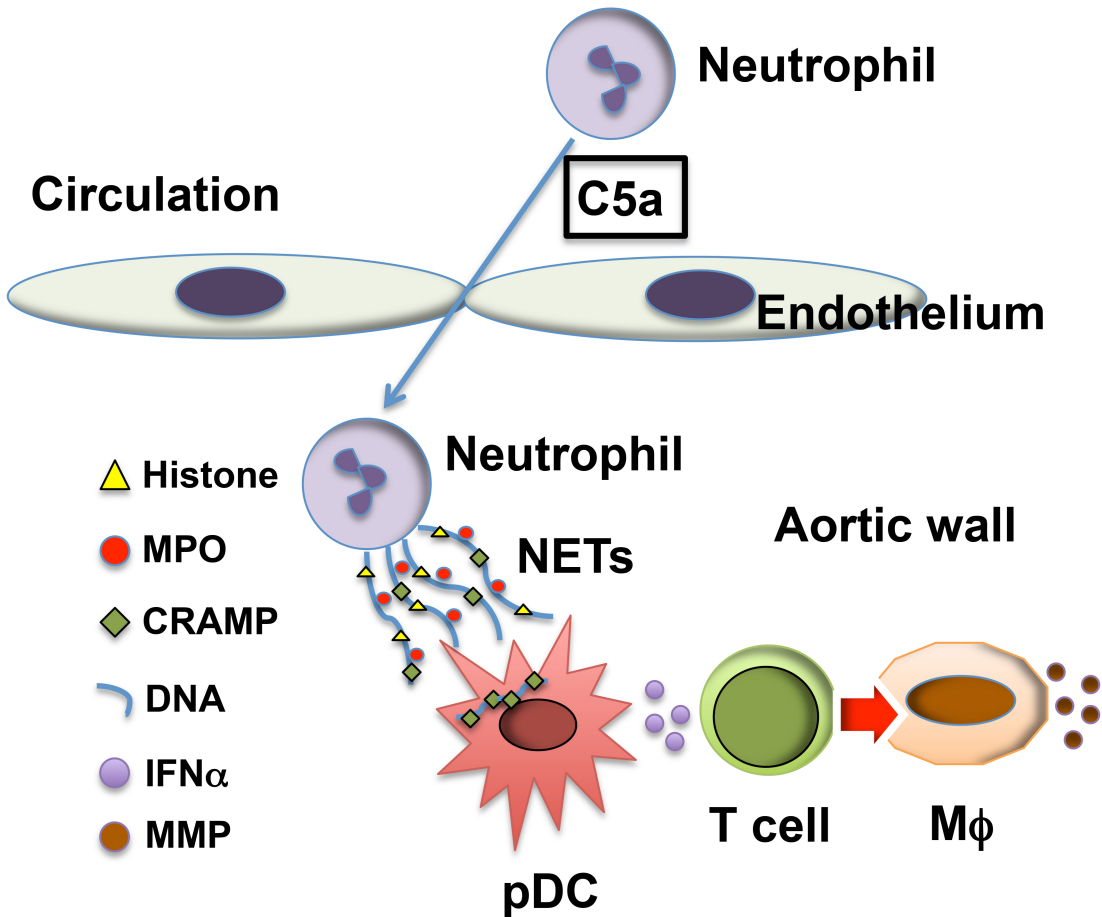

Supplement: NIHMS791831-supplement-Graphic_Abstract.pdf [file NIHMS791831-supplement-Graphic_Abstract.pdf]
